# Supplementary material for: On the impact of canopy environmental variables on the diurnal dynamics of the leaf and canopy water and carbon dioxide exchange
Source: Copernicus journal article supplement (doi:10.5194/egusphere-2023-2282), 2023-11-02
Supplement: Supplementary file [file egusphere-2023-2282-AC3-supplement.pdf]

## **Bibliography of the Response to reviewer # 1 of the manuscript:**

**“On the impact of canopy environmental variables on the diurnal dynamics of the leaf and canopy water and carbon dioxide exchange” by González-Armas et al.**

### **Bibliography**

- Maier, M., Schack-Kirchner, H., Hildebrand, E. E., & Schindler, D. (2011). Soil CO<sub>2</sub> efflux vs. soil respiration: Implications for flux models. *Agricultural and forest meteorology*, 151(12), 1723-1730.
- Systems, P. (2018). *EGM-5 Portable CO<sub>2</sub> Gas Analyzer Operation Manual*. Amesbury: PP Systems.
- Mangan, M. R., Hartogensis, O., van Heerwaarden, C., & Vilà-Guerau de Arellano, J. (2023). Evapotranspiration controls across spatial scales of heterogeneity. *Quarterly Journal of the Royal Meteorological Society*, 149(756), 2696-2718.
- Niyogi, D., Chang, H. I., Saxena, V. K., Holt, T., Alapaty, K., Booker, F., & Xue, Y. (2004). Direct observations of the effects of aerosol loading on net ecosystem CO<sub>2</sub> exchanges over different landscapes. *Geophysical Research Letters*, 31(20).
- Knohl, A., & Baldocchi, D. D. (2008). Effects of diffuse radiation on canopy gas exchange processes in a forest ecosystem. *Journal of Geophysical Research: Biogeosciences*, 113(G2).
- Pedruzo-Bagazgoitia, X., Ouwersloot, H. G., Sikma, M., Van Heerwaarden, C. C., Jacobs, C. M., & De Arellano, J. V. (2017). Direct and diffuse radiation in the shallow cumulus–vegetation system: Enhanced and decreased evapotranspiration regimes. *Journal of Hydrometeorology*, 18(6), 1731-1748.
- Renner, M., Kleidon, A., Clark, M., Nijssen, B., Heidkamp, M., B. M., & Abramowitz, G. (2021). How well can land-surface models represent the diurnal cycle of turbulent heat fluxes? *Journal of Hydrometeorology*, 22(1), 77-94.
